# Supplementary material for: Rhythm and ROS: Hepatic Chronotherapeutic Features of Grape Seed Proanthocyanidin Extract Treatment in Cafeteria Diet-Fed Rats
Source: MDPI journal article supplement (doi:10.3390/antiox12081606), 2023-08-12
Supplement: s1 [file s1]

**Table S1:** Weekly food intake of STD- and CAF-fed rats treated at ZT0 or ZT12 with VH or 25 mg/kg b.w. GSPE expressed in g/day and kcal/day.

|                           |     | Week 1                        | Week 2                        | Week 3                        | Week 4                        | Week 5                        | Treatment     | Week 6                        | Week 7                        | Week 8                        | Week 9                        |
|---------------------------|-----|-------------------------------|-------------------------------|-------------------------------|-------------------------------|-------------------------------|---------------|-------------------------------|-------------------------------|-------------------------------|-------------------------------|
| Food intake<br>(g/day)    | STD | 26.64 ± 1.74                  | 26.13 ± 2.15                  | 25.13 ± 1.74                  | 25.14 ± 2.16                  | 25.08 ± 1.62                  | ZT0-STD-VH    | 25.56 ± 1.58                  | 25.53 ± 1.33                  | 25.91 ± 5.25                  | 24.34 ± 1.24                  |
|                           |     |                               |                               |                               |                               |                               | ZT12-STD-VH   | 26.26 ± 1.11                  | 25.26 ± 2.09                  | 23.49 ± 1.53                  | 25.15 ± 1.94                  |
|                           | CAF | 68.22 ± 9.47 <sup>+++</sup>   | 64.19 ± 15.61 <sup>+++</sup>  | 62.76 ± 11.69 <sup>+++</sup>  | 64.66 ± 17.03 <sup>+++</sup>  | 57.69 ± 14.55 <sup>+++</sup>  | ZT0-CAF-VH    | 62.85 ± 10.95 <sup>++</sup>   | 55.03 ± 7.17 <sup>++</sup>    | 57.83 ± 7.96 <sup>+++</sup>   | 45.19 ± 14.72 <sup>++</sup>   |
|                           |     |                               |                               |                               |                               |                               | ZT0-CAF-GSPE  | 56.84 ± 11.63                 | 47.85 ± 8.24                  | 58.39 ± 12.2                  | 52.68 ± 11.7                  |
|                           |     |                               |                               |                               |                               |                               | ZT12-CAF-VH   | 63.09 ± 9.22 <sup>+++</sup>   | 54.7 ± 13.08 <sup>+++</sup>   | 58.33 ± 16.33 <sup>+++</sup>  | 57.14 ± 17.78 <sup>++</sup>   |
|                           |     |                               |                               |                               |                               |                               | ZT12-CAF-GSPE | 61.54 ± 8.64                  | 53.22 ± 3.4                   | 68.35 ± 15.65                 | 49.95 ± 10.55                 |
| Food intake<br>(kcal/day) | STD | 82.59 ± 5.41                  | 80.99 ± 6.68                  | 77.9 ± 5.38                   | 77.95 ± 6.71                  | 77.73 ± 5.04                  | ZT0-STD-VH    | 79.23 ± 4.9                   | 79.15 ± 4.12                  | 80.31 ± 16.28                 | 70.4 ± 12.83                  |
|                           |     |                               |                               |                               |                               |                               | ZT12-STD-VH   | 81.41 ± 3.44                  | 78.31 ± 6.48                  | 72.81 ± 4.76                  | 77.95 ± 6.00                  |
|                           | CAF | 332.87 ± 40.79 <sup>+++</sup> | 306.64 ± 77.12 <sup>+++</sup> | 286.98 ± 55.24 <sup>+++</sup> | 302.86 ± 84.24 <sup>+++</sup> | 270.07 ± 75.49 <sup>+++</sup> | ZT0-CAF-VH    | 302.76 ± 78.67 <sup>+++</sup> | 248.95 ± 32.08 <sup>+++</sup> | 262.8 ± 29.77 <sup>+++</sup>  | 202.12 ± 67.11 <sup>+++</sup> |
|                           |     |                               |                               |                               |                               |                               | ZT0-CAF-GSPE  | 278.87 ± 51.05                | 226.42 ± 31.87                | 280.49 ± 61.03                | 246.98 ± 47.69                |
|                           |     |                               |                               |                               |                               |                               | ZT12-CAF-VH   | 296.22 ± 24.37 <sup>+++</sup> | 246.08 ± 32.45 <sup>+++</sup> | 274.02 ± 76.98 <sup>+++</sup> | 256.17 ± 86.1 <sup>+++</sup>  |
|                           |     |                               |                               |                               |                               |                               | ZT12-CAF-GSPE | 294.41 ± 38.72                | 249.2 ± 35.14                 | 332.11 ± 83.99                | 227.1 ± 64.89                 |

Values are expressed as the mean ± SD. (*n* = 32 and 64 for STD and CAF-fed rats before treatment, respectively; 16 for each experimental group). + indicates significant differences (*p* < 0.05) by diet effect (STD-VH *vs.* CAF-VH) for each ZT treatment; ++ indicates *p* < 0.01; +++ indicates *p* < 0.001. using Student's *t*-test. STD, rats fed a Standard diet; CAF, rats fed a Cafeteria diet; VH, rats administered vehicle; GSPE, rats administered 25 mg/kg b.w. grape seed proanthocyanidin extract.

**Table S2:** Liver antioxidant-related parameters of STD- and CAF-fed rats treated at ZT0 or ZT12 with VH or 25 mg/kg b.w. GSPE.

|      |             | Sod<br>(U/mg protein)   | Catalase<br>(U/mg protein) | GPx1<br>(mU/mg protein)       | GSH<br>(nmol/g fresh tissue)   | Thiols<br>(nmol SH/mg protein) |
|------|-------------|-------------------------|----------------------------|-------------------------------|--------------------------------|--------------------------------|
| ZT0  | STD-VH      | 10.2 (9.6 - 10.56)      | 711.22 (652.19 - 766.62)   | 2078.03 (2070.86 - 2084.15)   | 3133.74 (3018.57 - 3238.67)    | 119,39 (107,89 - 125,92)       |
|      | ZT1 CAF-VH  | 11.72 (11.31 - 11.86)   | 720.95 (710.18 - 745.11)   | 2105.57 (1844.87 - 2342.46)   | 1997 (1958.18 - 1998.1) \$     | 86,52 (84,91 - 87,22)          |
|      | CAF-GSPE    | 9.59 (9.4 - 10.07)      | 628.31 (604.98 - 649.96) # | 1346.45 (1275.91 - 1589.75)   | 2054.13 (1640.3 - 2179.92)     | 88,17 (82,54 - 104,24)         |
|      | STD-VH      | 9.42 (9.3 - 9.63)       | 661.04 (644.7 - 694.23)    | 2019.01 (1856.61 - 2234.34)   | 3038.34 (2824.1 - 3093.92)     | 104,3 (85,96 - 116,88)         |
|      | ZT7 CAF-VH  | 10.54 (10.27 - 10.84) + | 721.21 (657.94 - 776.14)   | 1406.69 (1357.37 - 1520.52) + | 2274.96 (1542.43 - 3048.87)    | 108,15 (95,58 - 122,49)        |
|      | CAF-GSPE    | 9.87 (9.73 - 9.96) #    | 664.39 (642.27 - 716.37)   | 1619.85 (1372 - 1891.11)      | 2095.88 (1794.39 - 2439.39)    | 111,01 (100,52 - 120,92)       |
|      | STD-VH      | 13.54 (12.73 - 14.35)   | 722.29 (714.74 - 741.37)   | 2494.94 (2360.49 - 2603.32)   | 2204.43 (2147.76 - 2352.55)    | 83,76 (80,13 - 87,12)          |
|      | ZT13 CAF-VH | 14.76 (14.05 - 15.03)   | 724.02 (700.86 - 751.46)   | 2013.04 (1918.87 - 2084.62)   | 1999.65 (1633.34 - 2344.42)    | 80,4 (75,58 - 90,36)           |
|      | CAF-GSPE    | 15.84 (14.54 - 17.13)   | 714.77 (686.64 - 759.4)    | 2286.9 (2108.09 - 2372.41)    | 1599.94 (1360.02 - 1797.15)    | 89,94 (82,09 - 101,64)         |
|      | STD-VH      | 13.11 (12.26 - 13.9)    | 724.14 (695 - 748.1)       | 2496.15 (2365.07 - 2599.67)   | 2090.91 (1926.46 - 2198.96)    | 82,75 (75,51 - 90,19)          |
|      | ZT19 CAF-VH | 12.63 (12.62 - 12.73)   | 683.05 (666.55 - 698.16)   | 2037.15 (1891.08 - 2191.33)   | 1862.03 (1633.61 - 2033.14)    | 84,94 (82,21 - 87,68)          |
|      | CAF-GSPE    | 13.55 (13.06 - 14.21)   | 650.33 (634.68 - 670.51)   | 1985.89 (1736.22 - 2334.58)   | 1494.99 (1348.16 - 1557.59)    | 79,3 (74,43 - 83,48)           |
| ZT12 | STD-VH      | 10.47 (9.67 - 11.64)    | 721.88 (698.81 - 744.46)   | 2296.09 (2051.23 - 2441.45)   | 2758.19 (2320.37 - 3036.7)     | 109,61 (108,9 - 109,76)        |
|      | ZT1 CAF-VH  | 10.98 (10.31 - 11.78)   | 722.19 (717.64 - 726.22)   | 1686.36 (1617.97 - 1813.18)   | 2414.3 (2244.1 - 2504.21)      | 128,37 (116,54 - 139,57) \$    |
|      | CAF-GSPE    | 10.3 (10.19 - 10.54)    | 690.53 (652.68 - 736.07)   | 1710.86 (1607.78 - 1861.59)   | 2178.28 (2069.23 - 2416.68)    | 134,64 (121,78 - 142,2)        |
|      | STD-VH      | 10.78 (10.11 - 11.62)   | 725.53 (694.97 - 742.9)    | 2296.89 (2125.45 - 2540.07)   | 3033.77 (2951.82 - 3291.03)    | 121,5 (114,14 - 133,98)        |
|      | ZT7 CAF-VH  | 11.13 (10.91 - 11.41)   | 714.08 (655.4 - 791.33)    | 1833.63 (1664.38 - 1920.8) +  | 2365.05 (1974.57 - 2648.96) \$ | 130,15 (123,49 - 134,42)       |
|      | CAF-GSPE    | 10.98 (10.89 - 11.13)   | 763.3 (741.18 - 773.68)    | 1843.94 (1698.48 - 1876.91)   | 2029.77 (1741.65 - 2171.23)    | 122,96 (114,16 - 131,93)       |
|      | STD-VH      | 13.76 (13.43 - 13.89)   | 662.92 (647.56 - 701.2)    | 2465.76 (2382.33 - 2553.05)   | 1812.39 (1800.34 - 1887.77)    | 91,02 (78,07 - 104,6)          |
|      | ZT13 CAF-VH | 12.04 (11.36 - 12.91)   | 659.39 (644.3 - 674.92)    | 1700.94 (1512.93 - 1882.4) +  | 1948.27 (1842.69 - 2090.95)    | 86,64 (83,22 - 89,49)          |
|      | CAF-GSPE    | 11.16 (10.87 - 11.78)   | 652.89 (644.57 - 662.34)   | 1816.09 (1496.1 - 2108.56)    | 1888.86 (1682.44 - 2074.02)    | 88,05 (77,49 - 100,42)         |
|      | STD-VH      | 13.1 (12.17 - 13.76)    | 670.24 (651.74 - 690.47)   | 2344.17 (2107.79 - 2515.45)   | 2197.5 (1989.25 - 2420.08)     | 89,77 (84,25 - 94,12)          |
|      | ZT19 CAF-VH | 12.98 (12.78 - 13.84)   | 634.82 (622.26 - 650.85)   | 1767.47 (1716.32 - 1942.78)   | 1649.22 (1311.65 - 2059.42)    | 78,96 (76,32 - 83,3)           |
|      | CAF-GSPE    | 12.79 (12.66 - 12.97)   | 676.69 (638.55 - 708.27)   | 1790.95 (1497.62 - 2021.91)   | 1468.53 (1342.59 - 1606.33)    | 90,13 (89,53 - 90,84)          |

Values are expressed as the median (Q1-Q3), ( $n = 3 - 4$ ) for ZT0 and ZT12 conditions. + indicates significant differences ( $p < 0.05$ ) by diet effect (STD-VH vs. CAF-VH), \$ indicates tendency ( $0.1 > p \geq 0.05$ ) by diet effect; # tendency ( $0.1 > p \geq 0.05$ ) by treatment effect (CAF-VH vs. CAF-GSPE) using Mann-Whitney  $U$  test. STD, rats fed a Standard diet; CAF, rats fed a Cafeteria diet; VH, rats administered vehicle; GSPE, rats administered 25 mg/kg b.w. grape seed proanthocyanidin extract.

**Table S3:** Antioxidant-related metabolites in ZT0-treated rats expressed in arbitrary units.

| Metabolite                                       | ZT1                   |                           |                        | p-value | ZT7                   |                        |                       | p-value | ZT13                  |                         |                       | p-value | ZT19                     |                         |                        | p-value | STD-VH p-value | CAF-VH p-value | CAF-GSPE p-value | p-value |
|--------------------------------------------------|-----------------------|---------------------------|------------------------|---------|-----------------------|------------------------|-----------------------|---------|-----------------------|-------------------------|-----------------------|---------|--------------------------|-------------------------|------------------------|---------|----------------|----------------|------------------|---------|
|                                                  | STD-VH                | CAF-VH                    | CAF-GSPE               |         | STD-VH                | CAF-VH                 | CAF-GSPE              |         | STD-VH                | CAF-VH                  | CAF-GSPE              |         | STD-VH                   | CAF-VH                  | CAF-GSPE               |         |                |                |                  |         |
|                                                  |                       |                           |                        |         |                       |                        |                       |         |                       |                         |                       |         |                          |                         |                        |         |                |                |                  |         |
| 2-Hydroxybutyric Acid                            | 0.92 (0.56 - 2.04)    | 3.98 (3.88 - 4.08)        | 4.36 (4.26 - 4.38)#    | 0.140   | 0.86 (0.81 - 0.97)    | 1.25 (1.05 - 1.72)\$   | 2.07 (1.62 - 2.57)    | 0.059   | 1.23 (0.62 - 2.07)    | 5.52 (5.27 - 6.67)+     | 3.98 (3.65 - 4.18)*   | 0.007   | 2.39 (2.18 - 2.48)       | 4.11 (3.93 - 4.2)+      | 5.02 (4.12 - 5.8)      | 0.018   | 0.687          | 0.005          | 0.031            | 0.000   |
| 2-Hydroxyisobutyric Acid                         | 1.92 (1.68 - 2.13)    | 2.5 (2.42 - 2.56)+        | 2.25 (2.21 - 2.88)     | 0.076   | 2.41 (1.74 - 2.94)    | 2.71 (2.6 - 2.91)      | 3.34 (3.06 - 3.51)    | 0.276   | 2.01 (1.87 - 2.15)    | 3.25 (3.02 - 3.46)+     | 2.63 (2.35 - 3.04)    | 0.049   | 2.18 (2.08 - 2.32)       | 2.59 (2.41 - 2.85)\$    | 3.12 (2.91 - 3.36)     | 0.174   | 0.867          | 0.148          | 0.433            | 0.034   |
| 3-Hydroxybutyric Acid – 3-Hydroxyisobutyric Acid | 17 (11.59 - 30.45)    | 47.06 (37.19 - 58.6)      | 53.22 (48.36 - 55.43)  | 0.492   | 17.09 (14.47 - 20.31) | 15.08 (11.73 - 18.66)  | 29.47 (23.75 - 31.54) | 0.841   | 25.85 (8.87 - 42.88)  | 47.55 (44.03 - 55.37)\$ | 44.73 (39.42 - 46.77) | 0.077   | 34.98 (34 - 36.27)       | 34.09 (24.41 - 44.63)   | 51.45 (42.56 - 66.58)  | 0.309   | 0.205          | 0.041          | 0.162            | 0.044   |
| 4-Hydroxyphenyllactic Acid                       | 43.6 (42.67 - 44.31)  | 76.67 (67.36 - 87.66)+    | 34.19 (24.71 - 58.11)  | 0.115   | 38.93 (32.98 - 52.03) | 31.91 (23.1 - 43.09)   | 23.09 (13.19 - 44.11) | 0.298   | 22.36 (16.26 - 29.12) | 28.55 (25.55 - 34.27)   | 30.88 (29.71 - 32.73) | 0.368   | 36.15 (32.84 - 36.95)    | 33.07 (26.55 - 39.32)   | 27.1 (24.31 - 34.38)   | 0.694   | 0.111          | 0.059          | 0.812            | 0.173   |
| α-Ketoglutaric Acid                              | 5.17 (4.68 - 5.56)    | 11.82 (8.44 - 15.11)+     | 6.3 (4.99 - 7.75)      | 0.899   | 6.84 (5.87 - 7.39)    | 3.32 (3.26 - 3.76)+    | 4.9 (4.07 - 5.54)     | 0.551   | 4.84 (4.09 - 5.68)    | 6.11 (4.87 - 7.94)      | 6.86 (5.33 - 8.45)    | 0.368   | 7.12 (6.63 - 7.42)       | 8.57 (6.08 - 10.21)     | 6.39 (5.51 - 7.86)     | 0.779   | 0.099          | 0.350          | 0.453            | 0.393   |
| α-Tocopherol                                     | 0.05 (0.05 - 0.05)    | 0.04 (0.04 - 0.04)        | 0.03 (0.03 - 0.04)     | 0.268   | 0.03 (0.02 - 0.03)    | 0.1 (0.07 - 0.12)+     | 0.06 (0.05 - 0.06)    | 0.013   | 0.05 (0.03 - 0.06)    | 0.08 (0.07 - 0.09)\$    | 0.04 (0.03 - 0.06)    | 0.197   | 0.05 (0.05 - 0.05)       | 0.06 (0.05 - 0.07)      | 0.05 (0.04 - 0.05)     | 0.551   | 0.162          | 0.042          | 0.287            | 0.017   |
| Citric Acid                                      | 77.38 (67.36 - 82.92) | 149.78 (128.85 - 183.72)+ | 70.63 (64.73 - 102.5)# | 0.041   | 75.64 (69.51 - 78.84) | 50.44 (45.89 - 52.92)+ | 60.47 (46.99 - 81.22) | 0.472   | 69.23 (57.71 - 73.45) | 61.16 (52.83 - 83.38)   | 90.54 (79.06 - 99.76) | 0.981   | 104.24 (102.58 - 106.04) | 109.89 (95.24 - 115.07) | 89.06 (70.94 - 103.78) | 0.298   | 0.034          | 0.014          | 0.916            | 0.030   |
| Dodecanoic Acid                                  | 0.27 (0.26 - 0.3)     | 0.34 (0.28 - 0.38)        | 0.39 (0.34 - 0.4)      | 0.260   | 0.26 (0.24 - 0.28)    | 0.29 (0.29 - 0.3)      | 0.3 (0.29 - 0.31)     | 0.025   | 0.26 (0.25 - 0.26)    | 0.3 (0.3 - 0.3)+        | 0.37 (0.35 - 0.37)*   | 0.017   | 0.24 (0.21 - 0.27)       | 0.33 (0.28 - 0.39)+     | 0.36 (0.31 - 0.4)      | 0.033   | 0.225          | 0.142          | 0.222            | 0.002   |
| Fumaric Acid                                     | 2.26 (1.69 - 3.36)    | 4.49 (4.3 - 4.91)         | 2.64 (2.24 - 4.17)     | 0.920   | 3.01 (2.35 - 3.65)    | 2.09 (1.73 - 2.32)     | 2.53 (1.62 - 3.82)    | 0.874   | 2.21 (1.67 - 2.79)    | 2.6 (2.15 - 3.32)       | 2.84 (2.5 - 3.19)     | 0.874   | 2.64 (2.01 - 3.28)       | 3.12 (2.06 - 3.86)      | 3.19 (1.87 - 4.43)     | 0.694   | 0.750          | 0.734          | 0.784            | 0.979   |
| Glucose-6-phosphate                              | 0.05 (0.04 - 0.06)    | 0.04 (0.03 - 0.04)        | 0.03 (0.03 - 0.03)     | 0.302   | 0.05 (0.05 - 0.06)    | 0.04 (0.03 - 0.04)+    | 0.03 (0.02 - 0.04)    | 0.089   | 0.05 (0.05 - 0.05)    | 0.05 (0.05 - 0.05)      | 0.04 (0.04 - 0.04)    | 0.119   | 0.04 (0.04 - 0.05)       | 0.03 (0.02 - 0.03)+     | 0.02 (0.02 - 0.02)     | 0.017   | 0.954          | 0.104          | 0.261            | 0.010   |
| Glutamic Acid                                    | 9.01 (7.87 - 10.32)   | 10.17 (9.37 - 10.7)       | 7.42 (7.38 - 8.87)     | 0.628   | 10.84 (9.62 - 11.89)  | 9.06 (8.36 - 9.2)      | 9.03 (7.92 - 10.17)   | 0.276   | 9.13 (7.66 - 10.7)    | 10.31 (9.4 - 11.43)     | 10.24 (8.85 - 11.56)  | 0.618   | 10.27 (9.22 - 11.76)     | 10.68 (9.33 - 11.81)    | 8.09 (7.52 - 10.06)    | 0.735   | 0.657          | 0.185          | 0.794            | 0.740   |
| Glutamine                                        | 0.47 (0.43 - 0.51)    | 0.34 (0.31 - 0.35)+       | 0.34 (0.34 - 0.39)     | 0.464   | 0.38 (0.28 - 0.43)    | 0.56 (0.48 - 0.66)     | 0.44 (0.39 - 0.54)    | 0.351   | 0.54 (0.44 - 0.73)    | 0.34 (0.28 - 0.45)\$    | 0.42 (0.38 - 0.51)    | 0.130   | 0.39 (0.38 - 0.39)       | 0.52 (0.44 - 0.59)      | 0.57 (0.56 - 0.59)     | 0.064   | 0.129          | 0.248          | 0.260            | 0.119   |
| Glycine                                          | 5.25 (5.16 - 5.28)    | 5.24 (5.13 - 5.39)        | 4.89 (4.85 - 5.01)#    | 0.052   | 5.21 (4.94 - 5.4)     | 5.18 (4.81 - 5.54)     | 4.97 (4.67 - 5.04)    | 0.703   | 5.17 (4.96 - 5.29)    | 4.85 (4.6 - 5.11)       | 4.99 (4.92 - 5.06)    | 0.874   | 4.99 (4.98 - 5.14)       | 5.07 (4.83 - 5.33)      | 4.9 (4.57 - 5.28)      | 0.084   | 0.688          | 0.946          | 0.365            | 0.402   |

| Metabolite    | ZT1                   |                       |                       | ZT1<br>p-value | ZT7                   |                        |                       | ZT7<br>p-value | ZT13                  |                        |                        | ZT13<br>p-value | ZT19                 |                        |                       | ZT19<br>p-value | STD-VH<br>p-value | CAF-VH<br>p-value | CAF-GSPE<br>p-value | p-value |
|---------------|-----------------------|-----------------------|-----------------------|----------------|-----------------------|------------------------|-----------------------|----------------|-----------------------|------------------------|------------------------|-----------------|----------------------|------------------------|-----------------------|-----------------|-------------------|-------------------|---------------------|---------|
|               | STD-VH                | CAF-VH                | CAF-GSPE              |                | STD-VH                | CAF-VH                 | CAF-GSPE              |                | STD-VH                | CAF-VH                 | CAF-GSPE               |                 | STD-VH               | CAF-VH                 | CAF-GSPE              |                 |                   |                   |                     |         |
|               |                       |                       |                       |                |                       |                        |                       |                |                       |                        |                        |                 |                      |                        |                       |                 |                   |                   |                     |         |
| Glycolic Acid | 0.12 (0.11 - 0.13)    | 0.15 (0.14 - 0.16)+   | 0.15 (0.14 - 0.16)    | 0.313          | 0.13 (0.12 - 0.14)    | 0.14 (0.13 - 0.15)     | 0.13 (0.13 - 0.13)    | 0.584          | 0.13 (0.12 - 0.13)    | 0.14 (0.13 - 0.15)     | 0.15 (0.14 - 0.17)     | 0.471           | 0.11 (0.11 - 0.11)   | 0.14 (0.14 - 0.15)\$   | 0.14 (0.13 - 0.15)    | 0.874           | 0.892             | 0.897             | 0.982               | 0.958   |
| Isoleucine    | 4.13 (3.98 - 4.18)    | 3.64 (3.58 - 3.82)    | 3.58 (3.56 - 3.69)    | 0.066          | 3.78 (3.73 - 4.04)    | 4.41 (4.22 - 4.75)     | 4.18 (3.84 - 4.52)    | 0.776          | 3.73 (3.58 - 3.83)    | 3.3 (3.02 - 3.7)       | 3.13 (3.04 - 3.21)     | 0.078           | 4 (3.82 - 4.07)      | 3.27 (3.03 - 3.82)     | 3.45 (2.83 - 3.98)    | 0.137           | 0.491             | 0.840             | 0.192               | 0.056   |
| Lactic acid   | 75.32 (73.29 - 76.59) | 72.95 (68.72 - 79.45) | 70.28 (68.8 - 74.97)  | 0.385          | 82.06 (79.41 - 83.75) | 77.38 (70.97 - 83.28)  | 70.53 (66.12 - 74.81) | 0.167          | 84.27 (82.09 - 89.04) | 95.78 (90.35 - 97.79)  | 73.19 (67.63 - 78.12)* | 0.118           | 91.09 (87.7 - 95.36) | 76.33 (70.18 - 82.36)+ | 71.22 (64.4 - 81.72)  | 0.537           | 0.877             | 0.014             | 0.096               | 0.050   |
| Leucine       | 6.73 (6.4 - 6.87)     | 6.13 (5.64 - 6.57)    | 5.4 (5.34 - 5.78)     | 0.913          | 6.08 (5.95 - 6.51)    | 7.55 (7.03 - 8.03)\$   | 6.62 (6.31 - 7)       | 0.138          | 6.43 (6.13 - 6.61)    | 5.83 (5.22 - 6.49)     | 5.45 (5.29 - 5.74)     | 0.059           | 6.7 (6.23 - 6.86)    | 5.69 (5.22 - 6.43)     | 5.45 (4.71 - 6.29)    | 0.368           | 0.216             | 0.138             | 0.904               | 0.221   |
| Methionine    | 3.58 (3.39 - 3.66)    | 3.27 (3.09 - 3.44)    | 3.04 (3.02 - 3.08)    | 0.100          | 3.37 (3.14 - 3.59)    | 3.5 (3.37 - 3.57)      | 3.4 (3.34 - 3.42)     | 0.500          | 3.23 (3.18 - 3.31)    | 2.98 (2.84 - 3.15)     | 3.07 (2.94 - 3.16)     | 0.779           | 3.4 (3.37 - 3.41)    | 2.97 (2.9 - 3.15)      | 2.85 (2.44 - 3.3)     | 0.735           | 0.623             | 0.602             | 0.158               | 0.412   |
| myo-Inositol  | 0.92 (0.79 - 1)       | 0.81 (0.75 - 0.85)    | 0.64 (0.64 - 0.7)     | 0.181          | 0.98 (0.88 - 1.11)    | 0.84 (0.71 - 0.96)     | 0.84 (0.71 - 0.93)    | 0.643          | 0.92 (0.89 - 0.94)    | 0.88 (0.86 - 0.89)     | 0.78 (0.69 - 0.99)     | 0.537           | 0.94 (0.92 - 1.03)   | 0.75 (0.69 - 0.8)+     | 0.64 (0.62 - 0.71)    | 0.912           | 0.400             | 0.592             | 0.371               | 0.505   |
| Ornithine     | 2.32 (1.96 - 2.96)    | 1.63 (1.52 - 1.8)\$   | 1.86 (1.78 - 2.06)    | 0.230          | 1.88 (1.42 - 2.79)    | 2.24 (1.86 - 2.86)     | 1.69 (1.42 - 2.22)    | 0.432          | 2.6 (1.96 - 3.15)     | 1.53 (1.4 - 1.64)+     | 1.92 (1.72 - 2.07)     | 0.637           | 1.33 (1.3 - 1.47)    | 1.46 (1.14 - 1.88)     | 1.3 (1.13 - 1.53)     | 0.025           | 0.061             | 0.334             | 0.538               | 0.076   |
| Phenylalanine | 3.86 (3.6 - 3.88)     | 3.21 (3 - 3.46)       | 2.8 (2.79 - 2.98)     | 0.126          | 3.59 (3.44 - 3.93)    | 3.94 (3.78 - 4.08)     | 3.48 (3.41 - 3.58)*   | 0.551          | 3.62 (3.43 - 3.75)    | 3.35 (3.06 - 3.55)     | 3.09 (2.91 - 3.27)     | 0.059           | 3.75 (3.46 - 4)      | 2.98 (2.71 - 3.3)      | 3.07 (2.9 - 3.18)     | 0.904           | 0.075             | 0.172             | 0.444               | 0.087   |
| Pyruvic Acid  | 19.19 (17.3 - 19.73)  | 21.9 (17.07 - 25.88)  | 14.13 (14.07 - 17.02) | 0.138          | 25.16 (20.66 - 28.43) | 19.73 (17.9 - 23.18)   | 18.1 (16.35 - 19.38)  | 0.146          | 22.38 (20.47 - 24.03) | 28.63 (27.13 - 30.29)+ | 18.59 (15.79 - 22.43)* | 0.197           | 24.11 (24 - 25.02)   | 21.98 (19.97 - 22.83)+ | 17.25 (15.62 - 20.41) | 0.841           | 0.136             | 0.075             | 0.401               | 0.024   |
| Serine        | 9.73 (9.65 - 10.22)   | 12.1 (11.58 - 13.77)+ | 11.1 (11 - 11.18)*    | 0.722          | 8.61 (8.31 - 9.23)    | 12.78 (11.04 - 14.74)+ | 11.89 (11.28 - 12.66) | 0.069          | 9.08 (8.93 - 9.27)    | 10.52 (9.86 - 11.64)+  | 12.98 (11.5 - 14.5)    | 0.926           | 9.25 (8.86 - 9.62)   | 11.18 (9.08 - 13.39)   | 11.01 (10.63 - 12.5)  | 0.087           | 0.093             | 0.991             | 0.444               | 0.302   |
| Taurine       | 0.65 (0.55 - 0.69)    | 0.49 (0.37 - 0.89)    | 0.67 (0.49 - 2.38)    | 0.036          | 0.75 (0.67 - 0.8)     | 0.97 (0.76 - 1.21)     | 0.91 (0.57 - 1.19)    | 0.037          | 1.01 (0.94 - 1.22)    | 0.78 (0.57 - 0.97)\$   | 0.74 (0.68 - 0.83)     | 0.031           | 0.84 (0.48 - 1.21)   | 0.84 (0.74 - 1.08)     | 0.99 (0.96 - 1.27)    | 0.118           | 0.085             | 0.116             | 0.229               | 0.004   |
| Threonine     | 8.02 (7.61 - 8.39)    | 8.93 (8.51 - 9.77)    | 9.04 (8.61 - 9.1)     | 0.750          | 7.14 (6.53 - 7.77)    | 9 (7.97 - 9.75)        | 8.16 (7.58 - 8.72)    | 0.298          | 7.14 (6.8 - 7.56)     | 6.87 (6.34 - 7.42)     | 7.77 (7.21 - 8.46)#    | 0.693           | 6.72 (6.48 - 6.92)   | 6.37 (5.57 - 7.69)     | 6.61 (5.25 - 8.08)    | 0.472           | 0.300             | 0.543             | 0.304               | 0.497   |

Values are expressed as the median (Q1-Q3), ( $n = 4$ ) for ZT0 condition. + indicates significant differences ( $p < 0.05$ ) by diet effect (STD-VH *vs.* CAF-VH), \$ indicates tendency ( $0.1 > p \geq 0.05$ ) by diet effect; \* indicates significant differences ( $p < 0.05$ ) by treatment effect (CAF-VH *vs.* CAF-GSPE), # indicates tendency

( $0.1 > p \geq 0.05$ ) by treatment effect using Mann-Whitney test. p-value for each group comparison was calculated by Kruskal-Wallis' test. STD, rats fed a Standard diet; CAF, rats fed a Cafeteria diet; VH, rats administered vehicle; GSPE, rats administered 25 mg/kg b.w. grape seed proanthocyanidin extract.

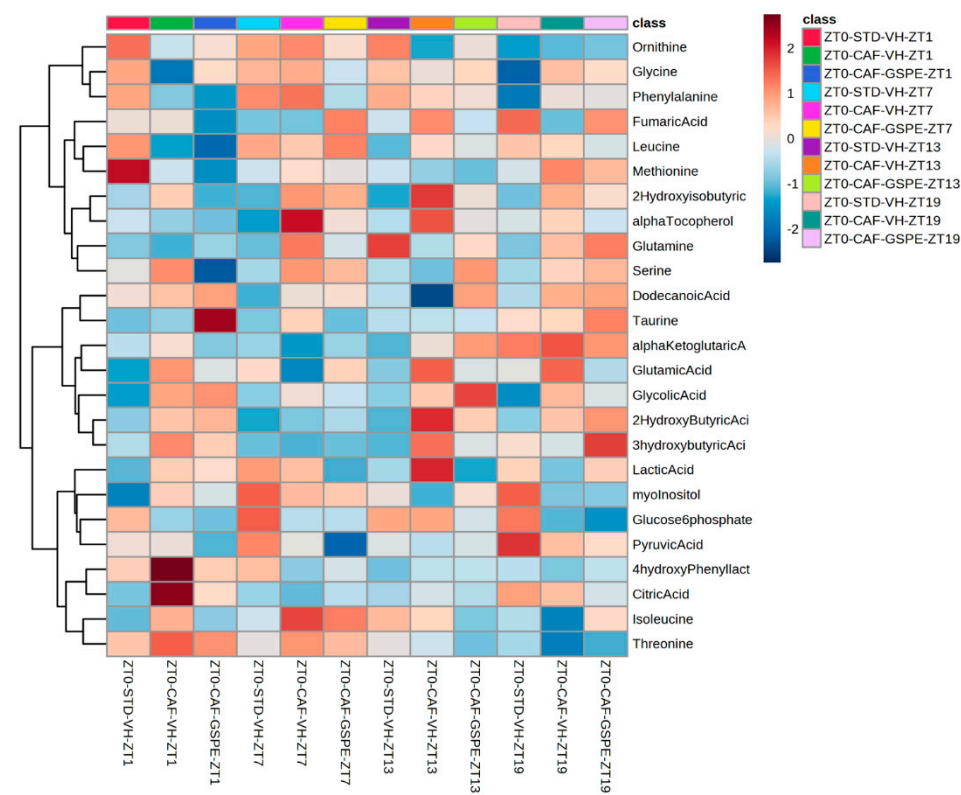

**Figure S1:** Heatmap analysis of antioxidant-related detected metabolites in liver metabolomics of rats treated at ZT0. STD, rats fed a Standard diet; CAF, rats fed a Cafeteria diet; VH, rats administered vehicle; GSPE, rats administered 25 mg/kg b.w. grape seed proanthocyanidin extract.

**Table S4:** Antioxidant-related metabolites in ZT12-treated rats expressed in arbitrary units.

| Metabolite                                       | ZT1                     |                         |                          | ZT1<br>p-value | ZT7                    |                          |                       | ZT7<br>p-value | ZT13                    |                       |                          | ZT13<br>p-value | ZT19                  |                        |                          | ZT19<br>p-value | STD-VH  | CAF-VH  | CAF-GSPE | p-value |
|--------------------------------------------------|-------------------------|-------------------------|--------------------------|----------------|------------------------|--------------------------|-----------------------|----------------|-------------------------|-----------------------|--------------------------|-----------------|-----------------------|------------------------|--------------------------|-----------------|---------|---------|----------|---------|
|                                                  | STD-VH                  | CAF-VH                  | CAF-GSPE                 |                | STD-VH                 | CAF-VH                   | CAF-GSPE              |                | STD-VH                  | CAF-VH                | CAF-GSPE                 |                 | STD-VH                | CAF-VH                 | CAF-GSPE                 |                 | p-value | p-value | p-value  |         |
|                                                  |                         |                         |                          |                |                        |                          |                       |                |                         |                       |                          |                 |                       |                        |                          |                 |         |         |          |         |
| 2-Hydroxybutyric Acid                            | 0.63 (0.62 - 0.85)      | 3.75 (2.76 - 4.28)+     | 2.16 (1.71 - 2.8)        | 0.219          | 0.86 (0.72 - 1.01)     | 1.38 (1.23 - 1.94)+      | 1.4 (1.11 - 1.84)     | 0.083          | 2.22 (1.81 - 2.67)      | 3.03 (2.5 - 3.96)     | 3.26 (2.44 - 4.16)       | 0.155           | 3.89 (3.58 - 4.38)    | 3.84 (3.02 - 4.6)      | 4.12 (3.8 - 4.65)        | 0.397           | 0.361   | 0.708   | 0.023    | 0.046   |
| 2-Hydroxyisobutyric Acid                         | 2.14 (2.06 - 2.28)      | 2.48 (2.01 - 2.83)      | 2.85 (2.64 - 3.08)       | 0.174          | 2.08 (1.78 - 2.3)      | 2.74 (2.59 - 2.8)+       | 2.56 (2.4 - 2.72)     | 0.276          | 1.94 (1.57 - 2.37)      | 3.22 (2.95 - 3.31)\$  | 2.95 (2.87 - 3.17)#      | 0.071           | 2.09 (2 - 2.6)        | 2.6 (2.39 - 2.72)      | 2.6 (2.38 - 2.83)        | 0.472           | 0.897   | 0.162   | 0.356    | 0.120   |
| 3-Hydroxybutyric Acid – 3-Hydroxyisobutyric Acid | 13.65 (10.54 - 19.42)   | 29.31 (21.95 - 40.08)\$ | 18.95 (16.4 - 21.98)     | 0.138          | 12.9 (10.63 - 14.43)   | 15.74 (13.83 - 21.5)     | 16.87 (11.86 - 21.42) | 0.472          | 33.3 (27.23 - 41.88)    | 35.18 (26.06 - 45.44) | 43.43 (40.03 - 51.98)    | 0.219           | 54.91 (51.46 - 60.4)  | 41.61 (34.35 - 44.04)+ | 42.89 (41.85 - 43.31)    | 0.055           | 0.009   | 0.282   | 0.007    | 0.001   |
| 4-Hydroxyphenyllactic Acid                       | 76.11 (64.13 - 86.98)   | 48.68 (32.84 - 65.25)   | 114.34 (82.21 - 144.56)# | 0.174          | 28.43 (26.02 - 40.03)  | 73.81 (59.57 - 86.39)    | 50 (41.99 - 51.87)    | 0.390          | 33.83 (29.81 - 37.3)    | 28.89 (22.83 - 41.48) | 42.35 (28.82 - 55.48)    | 0.841           | 30.38 (24.17 - 36.45) | 35.94 (32.4 - 36.68)   | 41.67 (33.37 - 64.39)    | 0.472           | 0.562   | 0.755   | 0.027    | 0.234   |
| α-Ketoglutaric Acid                              | 9.63 (8.99 - 10.52)     | 7.56 (5.98 - 8.57)\$    | 8.21 (6.82 - 10.31)      | 0.291          | 7.38 (6.99 - 7.96)     | 9.66 (7.36 - 11.33)      | 5.23 (4.94 - 6.02)    | 0.199          | 7.93 (6.21 - 9.88)      | 5 (4.07 - 7.63)       | 8.44 (7.64 - 8.81)       | 0.874           | 5.87 (4.9 - 6.81)     | 6.61 (5.74 - 7.51)     | 9.7 (8.01 - 11.27)       | 0.584           | 0.108   | 0.589   | 0.792    | 0.613   |
| α-Tocopherol                                     | 0.05 (0.03 - 0.08)      | 0.06 (0.05 - 0.08)      | 0.06 (0.06 - 0.06)       | 0.263          | 0.04 (0.04 - 0.04)     | 0.07 (0.06 - 0.08)+      | 0.09 (0.05 - 0.12)    | 0.081          | 0.05 (0.04 - 0.05)      | 0.08 (0.06 - 0.08)    | 0.07 (0.05 - 0.09)       | 0.333           | 0.05 (0.05 - 0.05)    | 0.07 (0.07 - 0.08)+    | 0.09 (0.08 - 0.09)       | 0.025           | 0.490   | 0.898   | 0.530    | 0.059   |
| Citric Acid                                      | 130.5 (109.15 - 138.59) | 80.42 (73.26 - 97.38)   | 123.05 (112.44 - 143.68) | 0.390          | 95.61 (81.28 - 118.58) | 111.99 (102.49 - 118.32) | 67.62 (61.67 - 90.98) | 0.298          | 109.67 (93.88 - 131.46) | 71.54 (57.9 - 101.71) | 125.84 (110.52 - 132.61) | 0.116           | 93.52 (87.92 - 94.81) | 96.16 (87.22 - 102.91) | 132.93 (115.14 - 159.09) | 0.232           | 0.642   | 0.080   | 0.290    | 0.196   |
| Dodecanoic Acid                                  | 0.07 (0.07 - 0.08)      | 0.16 (0.14 - 0.17)+     | 0.2 (0.18 - 0.25)        | 0.014          | 0.08 (0.07 - 0.08)     | 0.14 (0.11 - 0.17)       | 0.2 (0.16 - 0.26)     | 0.053          | 0.11 (0.1 - 0.12)       | 0.19 (0.16 - 0.25)+   | 0.21 (0.17 - 0.23)*      | 0.083           | 0.1 (0.09 - 0.1)      | 0.23 (0.19 - 0.25)+    | 0.19 (0.16 - 0.24)       | 0.024           | 0.969   | 0.189   | 0.599    | 0.002   |
| Fumaric Acid                                     | 3.56 (3.2 - 4.48)       | 2.93 (2.56 - 3.89)      | 3.62 (2.52 - 4.75)       | 0.442          | 3.74 (2.79 - 4.77)     | 3.17 (2.49 - 4.45)       | 2.59 (2.24 - 3.05)    | 0.437          | 2.51 (2.38 - 2.63)      | 2.1 (1.58 - 2.87)     | 2.63 (2.15 - 3.05)       | 0.926           | 2.27 (1.81 - 2.66)    | 2.38 (2.02 - 2.66)     | 3.08 (2.85 - 4.03)#      | 0.103           | 0.298   | 0.718   | 0.423    | 0.578   |
| Glucose-6-phosphate                              | 0.1 (0.08 - 0.1)        | 0.04 (0.03 - 0.05)\$    | 0.04 (0.03 - 0.05)       | 0.858          | 0.06 (0.06 - 0.06)     | 0.06 (0.05 - 0.06)       | 0.05 (0.04 - 0.05)    | 0.193          | 0.06 (0.05 - 0.08)      | 0.03 (0.02 - 0.03)+   | 0.05 (0.04 - 0.06)*      | 0.020           | 0.04 (0.03 - 0.04)    | 0.02 (0.02 - 0.02)\$   | 0.03 (0.02 - 0.04)       | 0.318           | 0.084   | 0.015   | 0.170    | 0.009   |
| Glutamic Acid                                    | 11.17 (10.2 - 11.46)    | 9.16 (7.96 - 10.33)\$   | 8.69 (7.68 - 9.75)       | 0.668          | 10.12 (9.42 - 11.02)   | 9.22 (9.05 - 9.39)       | 10.16 (9.69 - 10.27)  | 0.319          | 10.24 (9.13 - 11.65)    | 8.54 (7.72 - 9.67)    | 9.65 (9.05 - 11.16)      | 0.390           | 9.66 (9.11 - 10.29)   | 9.87 (9.49 - 10.33)    | 10.78 (9.92 - 11.61)     | 0.146           | 0.165   | 0.657   | 0.159    | 0.267   |

| Metabolite    | ZT1                   |                        |                       | ZT1<br>p-value | ZT7                    |                        |                       | ZT7<br>p-value | ZT13                  |                        |                        | ZT13<br>p-value | ZT19                  |                        |                       | ZT19<br>p-value | STD-VH CAF-VH CAF-GSPE |        |          |        |        |          |         |
|---------------|-----------------------|------------------------|-----------------------|----------------|------------------------|------------------------|-----------------------|----------------|-----------------------|------------------------|------------------------|-----------------|-----------------------|------------------------|-----------------------|-----------------|------------------------|--------|----------|--------|--------|----------|---------|
|               | STD-VH                | CAF-VH                 | CAF-GSPE              |                | STD-VH                 | CAF-VH                 | CAF-GSPE              |                | STD-VH                | CAF-VH                 | CAF-GSPE               |                 | STD-VH                | CAF-VH                 | CAF-GSPE              |                 | STD-VH                 | CAF-VH | CAF-GSPE | STD-VH | CAF-VH | CAF-GSPE | p-value |
|               |                       |                        |                       |                |                        |                        |                       |                |                       |                        |                        |                 |                       |                        |                       |                 |                        |        |          |        |        |          |         |
| Glutamine     | 0.45 (0.4 - 0.5)      | 0.52 (0.38 - 0.8)      | 0.44 (0.32 - 0.58)    | 0.861          | 0.77 (0.69 - 0.83)     | 0.47 (0.45 - 0.56)     | 0.57 (0.51 - 0.64)    | 0.123          | 0.37 (0.35 - 0.46)    | 0.8 (0.64 - 1)+        | 0.51 (0.45 - 0.55)*    | 0.397           | 0.51 (0.45 - 0.59)    | 0.67 (0.59 - 0.75)\$   | 0.67 (0.47 - 0.97)    | 0.608           | 0.046                  | 0.967  | 0.616    | 0.623  |        |          |         |
| Glycine       | 5.55 (5.47 - 5.63)    | 5.12 (4.83 - 5.34)+    | 4.8 (4.44 - 5.09)     | 0.491          | 5.26 (5.02 - 5.34)     | 4.5 (4.34 - 4.84)      | 5.32 (4.95 - 5.46)    | 0.794          | 5.2 (5.05 - 5.37)     | 4.75 (4.62 - 4.79)+    | 5.15 (5.13 - 5.22)*    | 0.551           | 4.87 (4.82 - 4.96)    | 5.14 (4.85 - 5.27)     | 4.85 (4.8 - 4.98)     | 0.393           | 0.159                  | 0.332  | 0.703    | 0.413  |        |          |         |
| Glycolic Acid | 0.08 (0.07 - 0.09)    | 0.11 (0.1 - 0.12)+     | 0.11 (0.11 - 0.12)    | 0.039          | 0.1 (0.09 - 0.1)       | 0.13 (0.11 - 0.14)+    | 0.12 (0.11 - 0.12)    | 0.694          | 0.08 (0.08 - 0.09)    | 0.12 (0.12 - 0.12)+    | 0.11 (0.11 - 0.11)*    | 0.024           | 0.09 (0.08 - 0.09)    | 0.12 (0.11 - 0.12)+    | 0.11 (0.1 - 0.13)     | 0.904           | 0.045                  | 0.985  | 0.595    | 0.121  |        |          |         |
| Isoleucine    | 4.79 (4.45 - 5.07)    | 4.41 (4.19 - 4.72)     | 4.42 (4.32 - 4.6)     | 0.141          | 4.73 (4.19 - 5.05)     | 4.37 (4.01 - 4.81)     | 4.1 (3.87 - 4.47)     | 0.109          | 3.46 (3.13 - 3.74)    | 3.67 (3.03 - 4.3)      | 3.39 (3.28 - 3.46)     | 0.017           | 3.18 (2.8 - 3.58)     | 3.5 (3.4 - 3.6)        | 3.63 (3.33 - 3.9)     | 0.594           | 0.770                  | 0.458  | 0.979    | 0.071  |        |          |         |
| Lactic acid   | 76.32 (70.53 - 82.04) | 75.08 (72.98 - 80.84)  | 87.36 (81.85 - 94.69) | 0.511          | 95.72 (87.36 - 101.69) | 104.51 (96.9 - 107.52) | 84.8 (78.29 - 94.92)  | 0.874          | 80.02 (79.36 - 81.49) | 93.95 (83.03 - 106.22) | 82.76 (81.61 - 85.72)  | 0.491           | 88.69 (82.2 - 95.09)  | 88.45 (84.42 - 95.42)  | 94.82 (90.46 - 99.66) | 0.944           | 0.016                  | 0.037  | 0.094    | 0.003  |        |          |         |
| Leucine       | 7.73 (6.98 - 8.5)     | 7.02 (6.67 - 7.52)     | 7.27 (6.94 - 7.54)    | 0.926          | 7.46 (6.95 - 7.75)     | 7.22 (6.7 - 7.75)      | 6.79 (6.18 - 7.5)     | 0.551          | 5.71 (5.24 - 6.17)    | 6.21 (5.35 - 6.94)     | 5.58 (5.41 - 5.74)     | 0.841           | 5.22 (4.82 - 5.65)    | 5.45 (5.39 - 5.58)     | 6.17 (5.97 - 6.33)*   | 0.944           | 0.205                  | 0.122  | 0.819    | 0.397  |        |          |         |
| Methionine    | 3.72 (3.61 - 3.84)    | 3.36 (3.25 - 3.48)+    | 3.22 (3.13 - 3.32)    | 0.841          | 3.31 (3.17 - 3.51)     | 3.28 (3.24 - 3.38)     | 3.24 (3.15 - 3.39)    | 0.794          | 2.97 (2.91 - 3.11)    | 3.07 (2.94 - 3.23)     | 2.95 (2.86 - 3.01)     | 0.437           | 3.01 (2.98 - 3.03)    | 3.03 (2.93 - 3.08)     | 2.85 (2.76 - 3)       | 0.058           | 0.168                  | 0.053  | 0.033    | 0.015  |        |          |         |
| myo-Inositol  | 1.16 (1 - 1.33)       | 0.84 (0.77 - 0.9)+     | 0.79 (0.75 - 0.82)    | 0.025          | 0.91 (0.79 - 1.13)     | 0.91 (0.84 - 0.97)     | 0.95 (0.89 - 0.97)    | 0.828          | 0.9 (0.84 - 0.99)     | 0.7 (0.62 - 0.76)+     | 0.74 (0.68 - 0.82)*    | 0.939           | 0.69 (0.63 - 0.74)    | 0.76 (0.73 - 0.77)\$   | 0.77 (0.72 - 0.81)    | 0.779           | 0.006                  | 0.190  | 0.094    | 0.006  |        |          |         |
| Ornithine     | 6.18 (5.14 - 6.99)    | 3.07 (2.85 - 3.39)+    | 3.04 (2.71 - 3.32)    | 0.024          | 2.85 (2.49 - 3.96)     | 3.22 (3 - 3.47)        | 2.47 (2.42 - 2.6)*    | 0.967          | 2.84 (2.59 - 3.04)    | 2.5 (1.94 - 3.08)      | 2.49 (2.38 - 2.52)     | 0.023           | 1.97 (1.8 - 2.16)     | 2.08 (1.86 - 2.5)      | 2.09 (1.98 - 2.19)    | 0.170           | 0.048                  | 0.187  | 0.170    | 0.016  |        |          |         |
| Phenylalanine | 3.86 (3.83 - 3.95)    | 3.52 (3.43 - 3.63)+    | 3.22 (3.12 - 3.31)*   | 0.064          | 3.92 (3.64 - 4.16)     | 3.76 (3.67 - 3.82)     | 3.51 (3.23 - 3.78)    | 0.138          | 3.28 (3.09 - 3.48)    | 3.33 (2.94 - 3.66)     | 2.95 (2.84 - 3.04)     | 0.492           | 3.09 (2.98 - 3.13)    | 2.78 (2.77 - 2.87)     | 3.18 (2.99 - 3.25)    | 0.668           | 0.024                  | 0.195  | 0.378    | 0.018  |        |          |         |
| Pyruvic Acid  | 15.79 (14.32 - 17.86) | 16.75 (13.77 - 19.06)  | 16.98 (14.1 - 20.44)  | 0.024          | 21.54 (20.17 - 22.63)  | 25.62 (20.68 - 29.33)  | 19.53 (18.39 - 20.35) | 0.123          | 15.41 (15.08 - 15.72) | 20.98 (18.59 - 22.72)  | 15.25 (14.9 - 16.7)    | 0.292           | 18.96 (13.97 - 23.81) | 18.97 (17.98 - 20.2)   | 17.2 (14.4 - 19.85)   | 0.127           | 0.023                  | 0.463  | 0.306    | 0.032  |        |          |         |
| Serine        | 10.75 (10.39 - 11.26) | 12.04 (11.86 - 12.42)+ | 13.27 (12.49 - 13.92) | 0.735          | 8.71 (8.25 - 9.28)     | 12.8 (10.91 - 14.64)+  | 14.17 (11.69 - 16.53) | 0.437          | 8.75 (8.43 - 9.07)    | 10.41 (9.66 - 11.2)+   | 10.34 (10.06 - 10.84)* | 0.584           | 8.04 (7.73 - 8.54)    | 10.66 (10.59 - 11.59)+ | 11.33 (10.44 - 12.54) | 0.491           | 0.150                  | 0.178  | 0.523    | 0.295  |        |          |         |
| Taurine       | 0.72 (0.3 - 1.54)     | 1.23 (0.89 - 1.49)     | 0.41 (0.28 - 0.58)    | 0.031          | 1.45 (1.37 - 1.51)     | 0.72 (0.56 - 1.17)     | 0.99 (0.83 - 1.36)    | 0.050          | 0.64 (0.58 - 0.78)    | 0.99 (0.94 - 1.08)     | 0.95 (0.8 - 1.46)      | 0.105           | 0.79 (0.64 - 1.04)    | 0.87 (0.62 - 1.07)     | 0.84 (0.5 - 1.18)     | 0.472           | 0.267                  | 0.117  | 0.042    | 0.005  |        |          |         |
| Threonine     | 9 (8.5 - 9.31)        | 8.85 (8.48 - 9.63)     | 7.69 (7.21 - 8.18)    | 0.694          | 7.39 (6.72 - 8.23)     | 8.66 (8.11 - 9.72)+    | 9.18 (8.43 - 10.46)   | 0.334          | 7.02 (6.1 - 7.63)     | 6.97 (6.45 - 7.56)     | 6.69 (6.17 - 7.51)     | 0.481           | 5.46 (5.23 - 5.8)     | 7.18 (6.66 - 7.67)+    | 7.04 (5.97 - 8.12)    | 0.779           | 0.086                  | 0.954  | 0.368    | 0.556  |        |          |         |

Values are expressed as the median (Q1-Q3), ( $n = 4$ ) for ZT0 condition. + indicates significant differences ( $p < 0.05$ ) by diet effect (STD-VH *vs.* CAF-VH), \$ indicates tendency ( $0.1 > p \geq 0.05$ ) by diet effect; \* indicates significant differences ( $p < 0.05$ ) by treatment effect (CAF-VH *vs.* CAF-GSPE), # indicates tendency ( $0.1 > p \geq 0.05$ ) by treatment effect using Mann-Whitney test. p-value for each group comparison was calculated by Kruskal-Wallis' test. STD, rats fed a Standard diet; CAF, rats fed a Cafeteria diet; VH, rats administered vehicle; GSPE, rats administered 25 mg/kg b.w. grape seed proanthocyanidin extract.

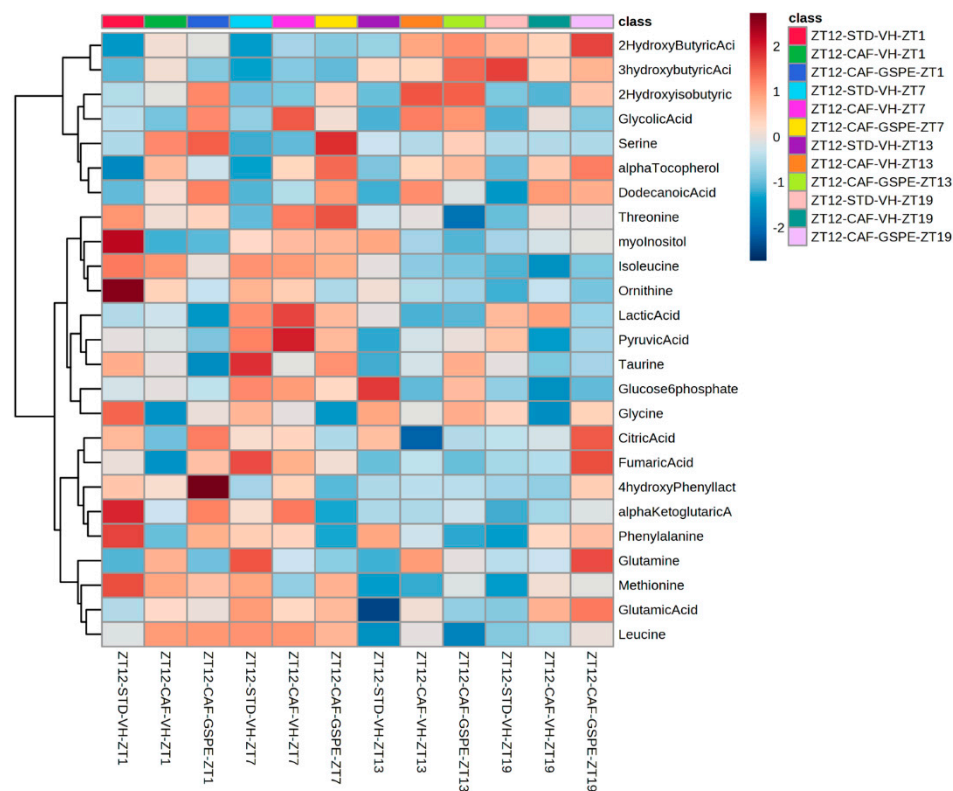

**Figure S2:** Heatmap analysis of antioxidant-related detected metabolites in liver metabolomics of rats treated at ZT0. STD, rats fed a Standard diet; CAF, rats fed a Cafeteria diet; VH, rats administered vehicle; GSPE, rats administered 25 mg/kg b.w. grape seed proanthocyanidin extract.
